# Supplementary material for: Three-dimensional macroporous CNT–SnO2 composite monolith for electricity generation and energy storage in microbial fuel cells
Source: Royal Society of Chemistry journal article supplement (doi:10.1039/c6ra11869k), 2016-01-01
Supplement: c6ra11869k1.pdf [file c6ra11869k1.pdf]

# Three-dimensional Macroporous Monolith of CNT-SnO<sub>2</sub> Composite for Electricity Generation and Energy Storage in Microbial Fuel Cells

## Supporting Information

Tigang Duan, Ye Chen\*, Qing Wen\*, Jinling Yin, Yuyang Wang

Key Laboratory of Superlight Materials and Surface Technology of Ministry of  
Education, College of Material Science and Chemical Engineering, Harbin  
Engineering University, Harbin, 15001, Heilongjiang, China

\*Corresponding authors.

Tel.: +86-13059004260.

Email-address: chenye511@126.com (Y Chen), wenqing@hrbeu.edu.cn (Q Wen).

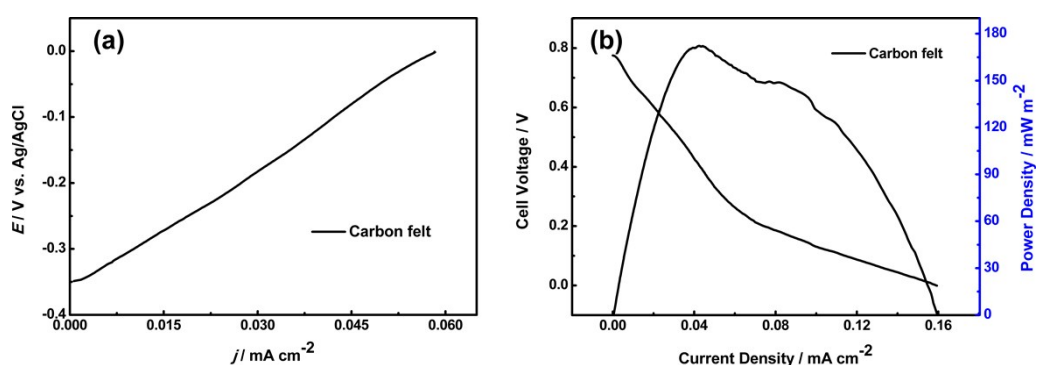

Fig. S1 (a) Anode polarization curve and (b) polarization curve and power density output of carbon felt in MFC.

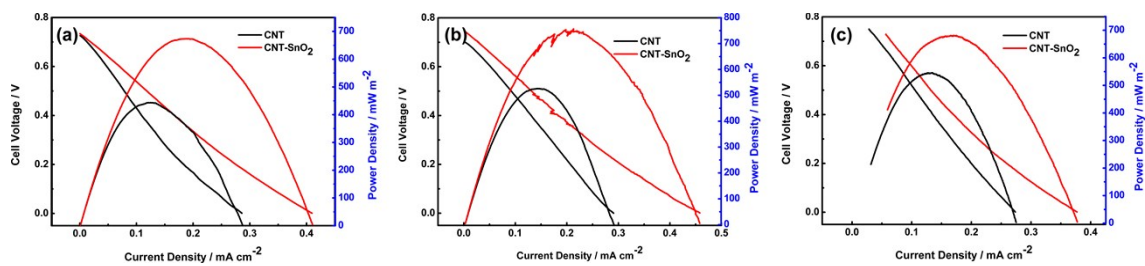

Fig. S2 Polarization curves and power density output of CNT-MFC and CNT-SnO<sub>2</sub>-

MFC for different test times: (a) 1<sup>st</sup>, (b) 3<sup>rd</sup> and (c) 7<sup>th</sup>.
